# Supplementary material for: Localized polyselenides in a graphene-coated polymer separator for high rate and ultralong life lithium–selenium batteries
Source: Royal Society of Chemistry journal article supplement (doi:10.1039/c5cc00089k), 2015-01-01
Supplement: c5cc00089k1.pdf [file c5cc00089k1.pdf]

## Supporting Information

# Localized polyselenides with a graphene-coated polymer separator for high rate and ultralong life lithium-selenium batteries

Ruopian Fang, Guangmin Zhou, Songfeng Pei, Feng Li\* and Hui-Ming Cheng

*Shenyang National Laboratory for Materials Science, Institute of Metal Research, Chinese Academy of Sciences, Shenyang 110016, China.*

E-mail: fli@imr.ac.cn

## Experimental details

### Graphene-Polymer Separator Fabrication

The graphene was fabricated by Deyang Carbonene Technology, using a process invented by Pei *et al.*<sup>1</sup> (Chinese patent No. CN201110282370.5). The graphene-polymer separator was fabricated by a vacuum-filtration process. Typically, the graphene was dispersed in ethanol to form a suspension with a concentration of 0.2 mg mL<sup>-1</sup>, then the suspension was vacuum filtered onto one side of a commercial polypropylene separator (Celgard 2400), followed by air drying at 80 °C for 30 min. The graphene-polymer separator was then punched into circular disks.

### Materials Characterization

The morphology and structure of the samples were characterized by using a scanning electron microscope (SEM) (FEI Nova NanoSEM 430, 15 kV) and a transmission electron microscope (TEM) (Tecnai F20, 200 kV). Raman measurements were performed using a Jobin Yvon LabRAM HR800, excited by a 632.8 nm He-Ne laser. X-ray diffraction (XRD) patterns were recorded on a Rigaku diffractometer using Cu K $\alpha$  radiation.

### Electrochemical Measurements

The cathode slurry was fabricated by mixing 70 wt% selenium as active material, 20 wt% Super P as conductive agent and 10 wt% polyvinylidene fluoride (PVDF) as binder in N-methyl-2-pyrrolidone (NMP). The slurry was coated onto an Al foil followed by drying under vacuum at 100 °C for 24 h. The dried electrode was punched into circular disks with a diameter of 12 mm and the active material loading is about 4 mg cm<sup>-2</sup>. CR-2025 type stainless steel coin cells were assembled with lithium metal foil as anode, selenium as cathode and a polypropylene polymer or an as-prepared graphene-polymer as separator. The electrolyte was prepared by

dissolving lithium bis-trifluoromethanesulphonylimide (LITFSI, 99%, Acros Organics, 1 M) and lithium nitrate ( $\text{LiNO}_3$ , 99.9%, Alfa Asea, 0.1 M) in 1, 2-dimethoxyethane (DME, 99.5%, Alfa Asea) and 1,3-dioxolane (DOL, 99.5%, Alfa Asea) (1:1 ratio, by volume). A LAND galvanostatic charge–discharge instrument was used to perform electrochemical measurements. The C-rate used here was based on the theoretical specific capacity of selenium ( $678 \text{ mAh g}^{-1}$ ), the current density was varied from 0.339 to  $3.39 \text{ A g}^{-1}$  referring to the mass loading of selenium in the cathode. The charge-discharge voltage range was 1.7-2.8 V. The CV test was performed using a VSP-300 multichannel potentiostat/galvanostat workstation operated in the voltage range of 1.7-2.8 V (vs.  $\text{Li}^+/\text{Li}$ ) at a scan rate of  $0.1 \text{ mV s}^{-1}$ .

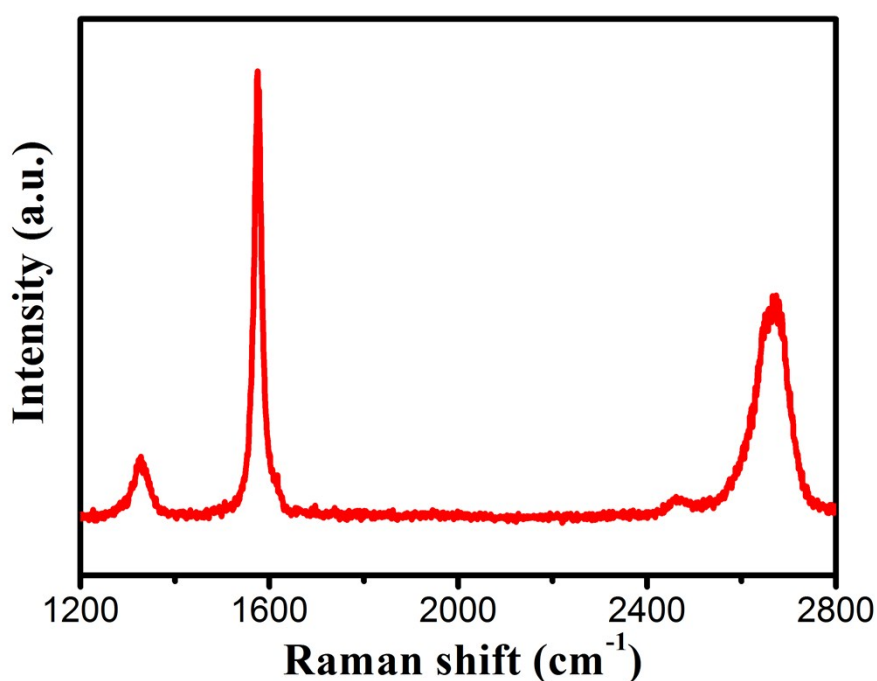

**Fig. S1** Raman spectrum of the graphene used for the graphene-polymer separator.

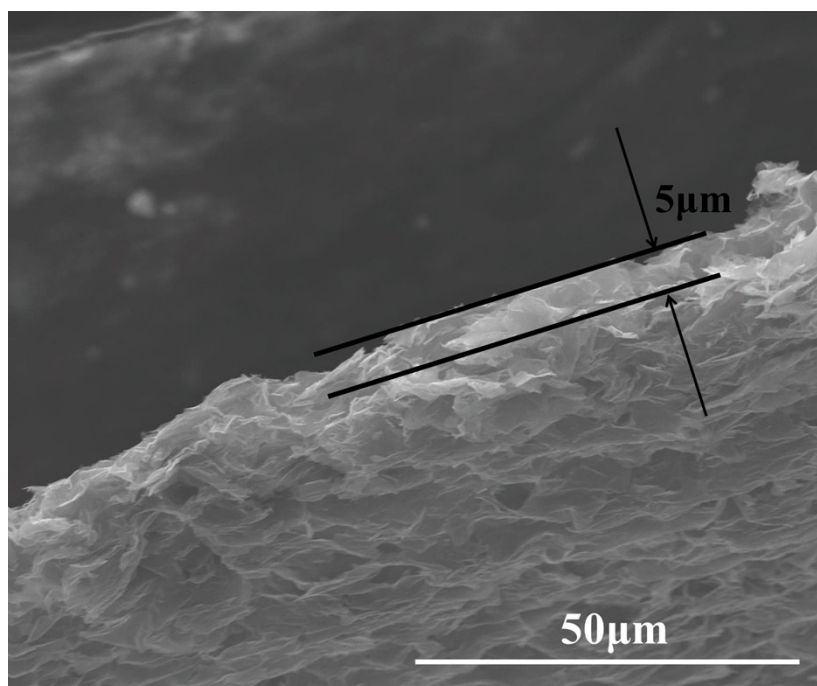

**Fig. S2** Cross-sectional SEM image of the graphene layer in a graphene-polymer separator.

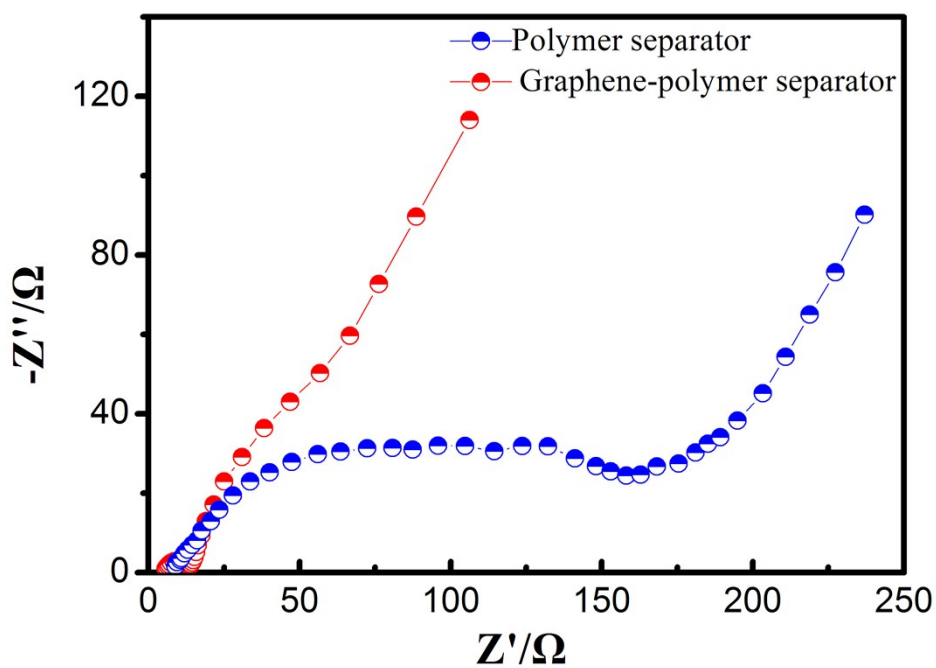

**Fig. S3** Electrochemical impedance spectra of Li-Se cells with different separators recorded after 10 cycles (inset is the magnified plot for the cell with a graphene-polymer separator).

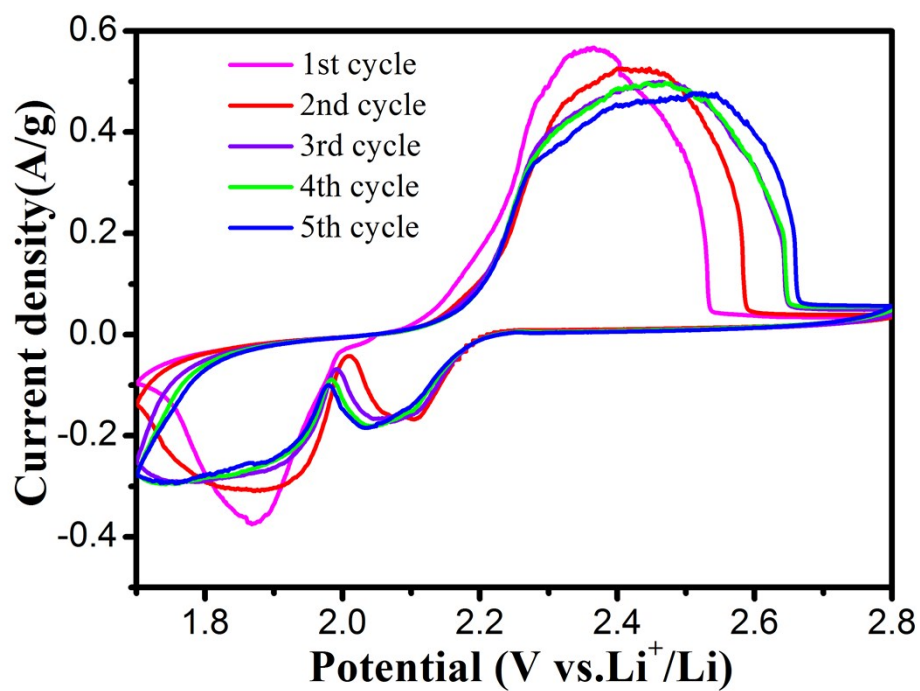

**Fig. S4** CV curves of the cell with a polymer separator at a scan rate of  $0.1 \text{ mV s}^{-1}$  for five cycles.

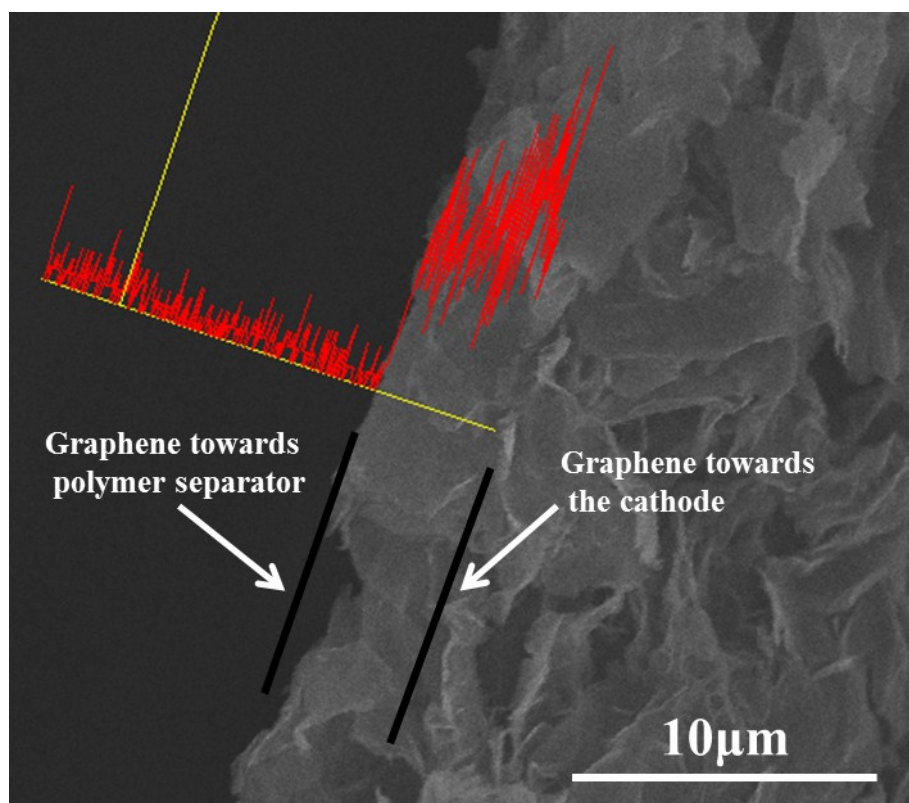

**Fig. S5** Cross-sectional elemental line scan of Se on the graphene interlayer after cycling.

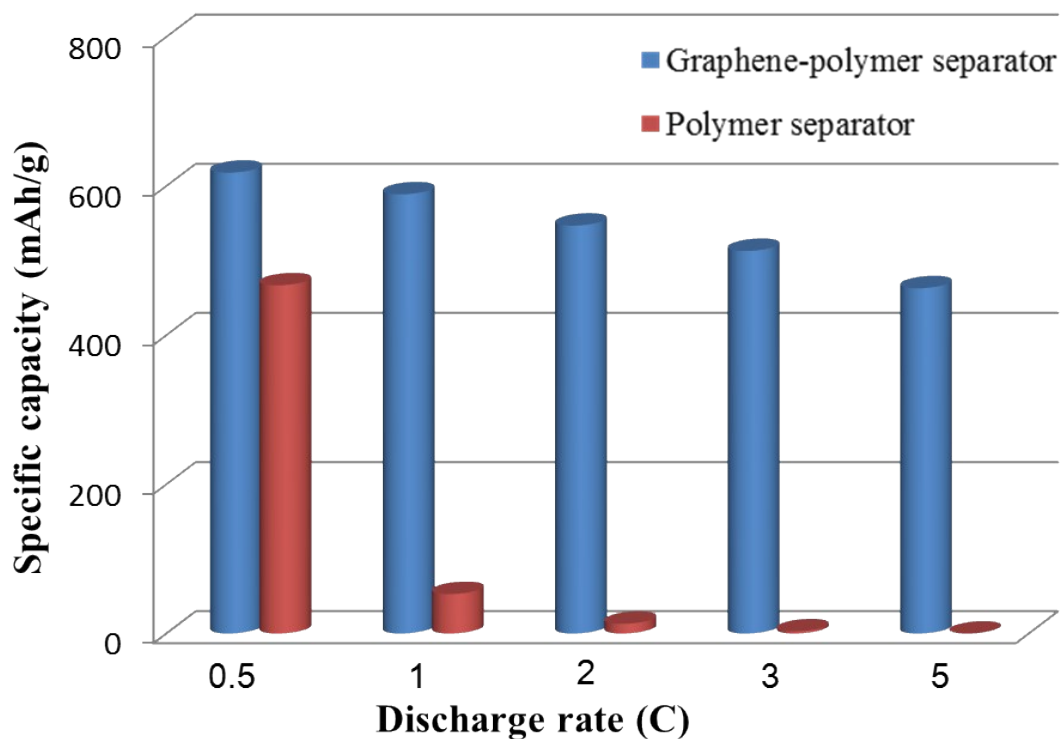

Fig. S6 Rate performance of Li-Se cells with different separators at different rates.

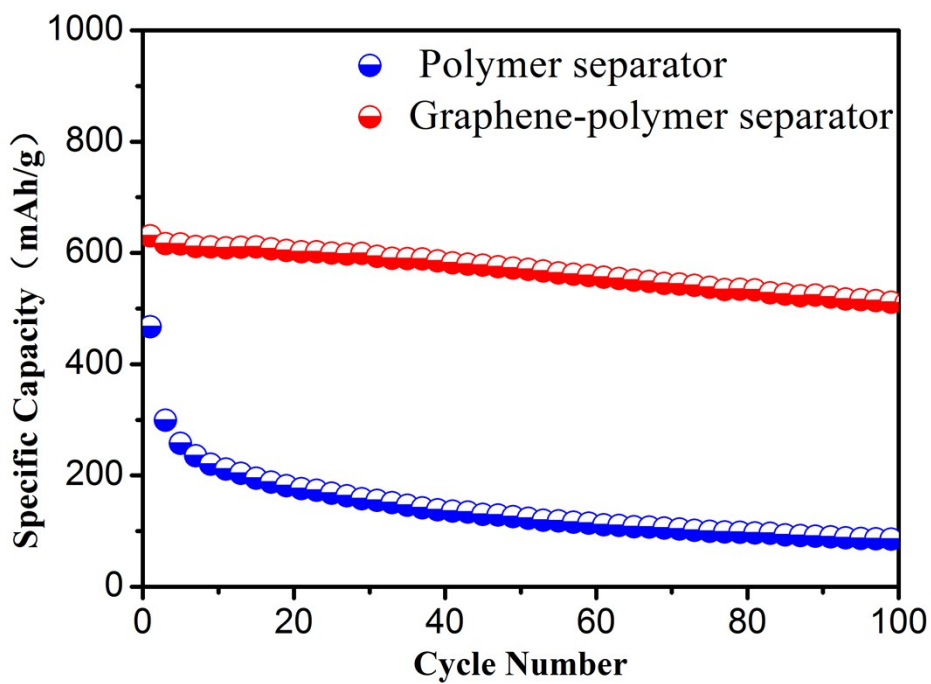

Fig. S7 Cycling stability of a Li-Se cell at 0.5C.

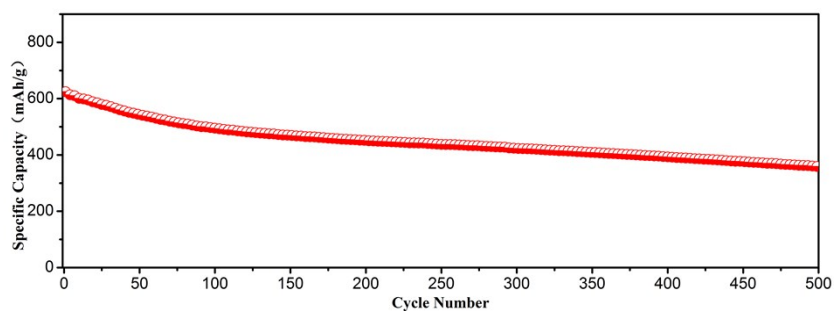

**Fig. S8** Cycling stability of a Li-Se cell with a graphene-polymer separator at 1C.

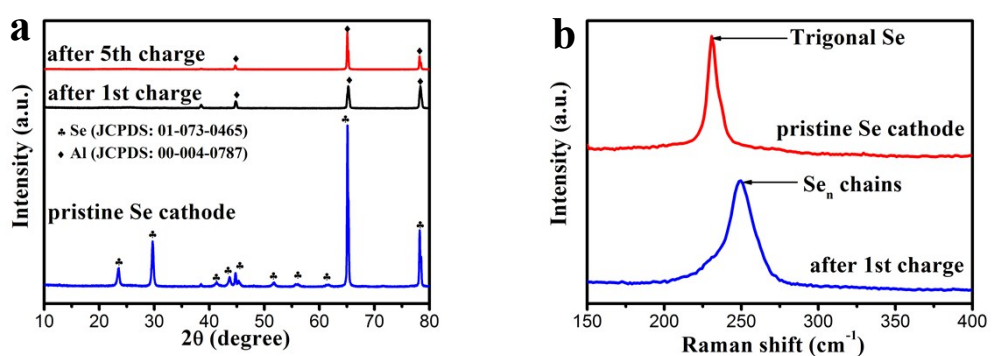

**Fig. S9** (a) XRD patterns and (b) Raman spectra of the Se cathode at different charge states.

1 W. C. Ren and H. M. Cheng, *Nat. Nanotechnol.*, 2014, **9**, 726-730.
